# Supplementary material for: A Systematic Review and Meta-Analysis of the Direct Comparison of Second-Generation Cryoballoon Ablation and Contact Force-Sensing Radiofrequency Ablation in Patients with Paroxysmal Atrial Fibrillation
Source: MDPI journal article supplement (doi:10.3390/jpm12020298), 2022-02-17
Supplement: s1 [file s1]

Supplementary Table S1. Detailed search strategy.

| Database           | Keywords                                                                                                                                                                                                                                                                                     | Record identified |
|--------------------|----------------------------------------------------------------------------------------------------------------------------------------------------------------------------------------------------------------------------------------------------------------------------------------------|-------------------|
| ClinicalTrials.gov | 'pulmonary vein isolation'                                                                                                                                                                                                                                                                   | 199               |
|                    | 'second-generation cryoballoon'                                                                                                                                                                                                                                                              | 1                 |
|                    | '2nd generation cryoballoon'                                                                                                                                                                                                                                                                 | 1                 |
|                    | 'contact force radiofrequency'                                                                                                                                                                                                                                                               | 12                |
|                    | 'contact force-sensing radiofrequency'                                                                                                                                                                                                                                                       | 5                 |
| Cochrane           | ('ablation' OR 'catheter ablation') AND ('pulmonary vein isolation' OR 'PVI') AND ('second-generation cryoballoon' OR '2nd generation cryoballoon') AND ('contact force radiofrequency' OR 'contact force-sensing radiofrequency') AND ('paroxysmal atrial fibrillation' OR 'paroxysmal AF') | 9                 |
| ProQuest           | ('ablation' OR 'catheter ablation') AND ('pulmonary vein isolation' OR 'PVI') AND ('second-generation cryoballoon' OR '2nd generation cryoballoon') AND ('contact force radiofrequency' OR 'contact force-sensing radiofrequency') AND ('paroxysmal atrial fibrillation' OR 'paroxysmal AF') | 290               |
| PubMed             | ('ablation' OR 'catheter ablation') AND ('pulmonary vein isolation' OR 'PVI') AND ('second-generation cryoballoon' OR '2nd generation cryoballoon') AND ('contact force radiofrequency' OR 'contact force-sensing radiofrequency') AND ('paroxysmal atrial fibrillation' OR 'paroxysmal AF') | 22                |
| ScienceDirect      | ('ablation' OR 'catheter ablation') AND ('pulmonary vein isolation' OR 'PVI') AND ('second-generation cryoballoon' OR '2nd generation cryoballoon') AND ('contact force radiofrequency' OR 'contact force-sensing radiofrequency') AND ('paroxysmal atrial fibrillation' OR 'paroxysmal AF') | 204               |
| Other source       | Potentially relevant papers from the reference lists of the examined articles                                                                                                                                                                                                                | 9                 |

AF = atrial fibrillation; PVI = pulmonary vein isolation

Supplementary Table S2. Modified Jadad Scale.

| Author                    | Was the study described as randomized? | Was the method of randomization appropriate? | Was the study described as blinding? | Was the method of blinding appropriate? | Was there a description of withdrawals and dropouts? | Was there a clear description of the inclusion/exclusion criteria? | Was the method used to assess adverse effects described? | Were the methods of statistical analysis described? | Modified Jadad scale |
|---------------------------|----------------------------------------|----------------------------------------------|--------------------------------------|-----------------------------------------|------------------------------------------------------|--------------------------------------------------------------------|----------------------------------------------------------|-----------------------------------------------------|----------------------|
| Giannopoulos, et al, 2019 | 1                                      | 1                                            | 0.5                                  | 1                                       | 0                                                    | 1                                                                  | 1                                                        | 1                                                   | 6.5                  |
| Gunawardene, et al, 2018  | 1                                      | 1                                            | 0                                    | 0                                       | 1                                                    | 1                                                                  | 1                                                        | 1                                                   | 6                    |
| Watanabe, et al, 2018     | 1                                      | 1                                            | 0                                    | 0                                       | 0                                                    | 1                                                                  | 1                                                        | 1                                                   | 5                    |

Supplementary Table S3. Methodological index for non-randomized studies.

| Author                | A clearly stated aim | Inclusion of consecutive patients | Prospective collection of data | Endpoints appropriate to the aim the of study | Unbiased assessment of the study endpoint | Follow-up period appropriate to the aim of the study | The loss to follow up <5% | Prospective calculation of study size | An adequate control group | Contemporary group | Baseline equivalence of groups | Adequate statistical analysis | MINORS |
|-----------------------|----------------------|-----------------------------------|--------------------------------|-----------------------------------------------|-------------------------------------------|------------------------------------------------------|---------------------------|---------------------------------------|---------------------------|--------------------|--------------------------------|-------------------------------|--------|
| Hassan, et al, 2020   | 2                    | 2                                 | 2                              | 2                                             | 0                                         | 2                                                    | 2                         | 0                                     | 2                         | 2                  | 1                              | 2                             | 19     |
| Hisazaki, et al, 2019 | 2                    | 2                                 | 0                              | 2                                             | 0                                         | 2                                                    | 2                         | 0                                     | 2                         | 2                  | 2                              | 2                             | 18     |
| Jourda, et al, 2015   | 2                    | 2                                 | 2                              | 2                                             | 0                                         | 2                                                    | 0                         | 2                                     | 2                         | 2                  | 1                              | 2                             | 19     |
| Kardos, et al, 2016   | 2                    | 1                                 | 2                              | 2                                             | 0                                         | 2                                                    | 2                         | 0                                     | 2                         | 2                  | 2                              | 2                             | 19     |
| Matta, et al, 2018    | 2                    | 2                                 | 2                              | 2                                             | 0                                         | 2                                                    | 0                         | 0                                     | 2                         | 2                  | 2                              | 2                             | 18     |
| Squara, et al, 2015   | 2                    | 2                                 | 1                              | 2                                             | 0                                         | 2                                                    | 0                         | 0                                     | 2                         | 2                  | 2                              | 2                             | 17     |
| Tanaka, et al, 2019   | 2                    | 2                                 | 0                              | 2                                             | 0                                         | 2                                                    | 2                         | 2                                     | 2                         | 2                  | 2                              | 2                             | 20     |
| Xiao, et al, 2020     | 2                    | 2                                 | 0                              | 2                                             | 0                                         | 2                                                    | 0                         | 2                                     | 2                         | 2                  | 1                              | 2                             | 17     |
| Yokokawa, et al, 2017 | 2                    | 2                                 | 0                              | 2                                             | 0                                         | 2                                                    | 2                         | 0                                     | 2                         | 2                  | 1                              | 2                             | 17     |

MINORS = methodological index for non-randomized studies.
